# Supplementary material for: Anti-inflammatory and osteoconductive multi-functional nanoparticles for the regeneration of an inflamed alveolar bone defect
Source: Royal Society of Chemistry journal article supplement (doi:10.1039/d4bm01280a), 2025-01-01
Supplement: d4bm01280a2.pdf [file d4bm01280a2.pdf]

Supplementary Material

**Anti-Inflammatory and Osteoconductive Multi-functional Nanoparticles for  
Regeneration of Inflamed Alveolar Bone defect**

*Hyewoo Jeong<sup>1</sup>, Keerthana Subramanian<sup>1</sup>, Jong-Bin Lee, Hayeon Byun, Heungsoo Shin<sup>\*</sup>,  
Jeong-Ho Yun<sup>\*</sup>*

<sup>1</sup>Hyewoo Jeong and Keerthana Subramanian contributed equally to this manuscript.

<sup>\*</sup>Heungsoo Shin and Jeong-Ho Yun are co-corresponding authors.

## Materials

Sodium chloride (NaCl), magnesium chloride (MgCl<sub>2</sub>), and sodium hydroxide (NaOH) were purchased from Junsei Chemicals Co. Ltd. (Tokyo, Japan). Potassium chloride (KCl), sodium phosphate dibasic (Na<sub>2</sub>HPO<sub>4</sub>), sodium bicarbonate (NaHCO<sub>3</sub>), potassium persulfate (K<sub>2</sub>S<sub>2</sub>O<sub>8</sub>), tannic acid (TA), collagenase, 1,10-phenanthroline, 2,2'-azino-bis(3-ethylbenzothiazoline-6-sulfonic acid) diammonium salt (ABTS), iron(III) chloride hexahydrate (FeCl<sub>3</sub>), ascorbic acid, thiazolyl blue tetrazolium bromide (MTT), dimethyl sulfoxide (DMSO), sucrose, Triton<sup>TM</sup> X-100, trizma-base, tween20 and anti-rabbit immunoglobulin G (IgG) were purchased from Sigma-Aldrich (St. Louis, MO, USA). Rapi-Plug<sup>TM</sup> S biodegradable collagen sponges were purchased from Dalim (Seoul, Korea). Phosphate-buffered saline (PBS), Dulbecco's phosphate-buffered saline, and Dulbecco's modified Eagle's medium (DMEM) were purchased from SolBio (Suwon, Korea). Fetal bovine serum (FBS) and penicillin-streptomycin (PS) were purchased from Gibco (Carlsbad, CA, USA). CEFoGro<sup>TM</sup> human MSC Growth Medium (MSC-GM) was purchased from CEFO (Seoul, Korea). LIVE/DEAD Viability/Cytotoxicity Kit and Streptavidin FITC were purchased from Invitrogen (Carlsbad, CA, USA). Lipopolysaccharide from *P. gingivalis* (LPS-PG) was purchased from InvivoGen (San Diego, CA, USA). Calcium chloride (CaCl<sub>2</sub>) was purchased from DUKSAN (Gyeonggi-do, Korea), and hydrochloric acid (HCl) was purchased from EMD Millipore (Darmstadt, Germany). Tris (hydroxymethyl) aminomethane hydrochloride (TRIS-HCl) was purchased from IBI Scientific (Dubuque, IA, USA). The RNeasy Mini Kit was purchased from Qiagen (Valencia, CA, USA), Maxime RT Premix from Intron (Seoul, Korea), and SYBR Premix Ex Taq from TAKARA (Otsu, Shiga, Japan). The anti-mannose receptor (anti-CD206), anti-inducible nitric oxide (iNOS), anti-osteopontin (OPN), and anti-runt-related transcription factor 2 (RUNX2) antibodies were purchased from Abcam (Cambridge, MA, USA). Mounting medium containing 4', 6-diamidino-2-phenylindole (DAPI) was bought from

Vectashield® (Burlingame, CA, USA), and 4% paraformaldehyde phosphate buffer solution was obtained from Wako Pure Chemical (Osaka, Japan).

**Table S1.** Murine inflammatory primer sequences used for RT-PCR

| Primer Name       | Primer Sequence (5' → 3')  |
|-------------------|----------------------------|
| GAPDH Fw          | AAC TTT GGC ATT GTG GAA GG |
| GAPDH Rv          | ACA CAT TGG GGG TAG GAA CA |
| iNOS Fw           | CCC CGC TAC TAC TCC ATC AG |
| iNOS Rv           | CCA CTG ACA CTT CGC ACA AA |
| MIP-1 $\alpha$ Fw | CAA CCA AGT CTT CTC AGC GC |
| MIP-1 $\alpha$ Rv | CTT TGG AGT CAG CGC AGA TC |
| IL-1 $\beta$ Fw   | GAC CTT CCA GGA TGA GGA CA |
| IL-1 $\beta$ Rv   | AGC TCA TAT GGG TCC GAC AG |

**Table S2.** Human osteogenic primer sequences used for RT-PCR

| Primer Name | Primer Sequence (5' → 3')  |
|-------------|----------------------------|
| GAPDH Fw    | GTC AGT GGT GGA CCT GAC CT |
| GAPDH Rv    | TGC TGT AGC CAA ATT CGT TG |
| RUNX2 Fw    | GCA GTT CCC AAG CAT TTC AT |
| RUNX2 Rv    | CAC TCT GGC TTT GGG AAG AG |
| OCN Fw      | GTG CAG AGT CCA GCA AAG GT |
| OCN Rv      | TCA GCC AAC TCG TCA CAG TC |
| OSX Fw      | TAA TGG GCT CCT TTC ACC TG |
| OSX Rv      | CAC TGG GCA GAC AGT CAG AA |
| OPN Fw      | TGA ACC GAG TCA GCT GGA TG |
| OPN Rv      | TGA AAT TCA TGG CTG TGG AA |

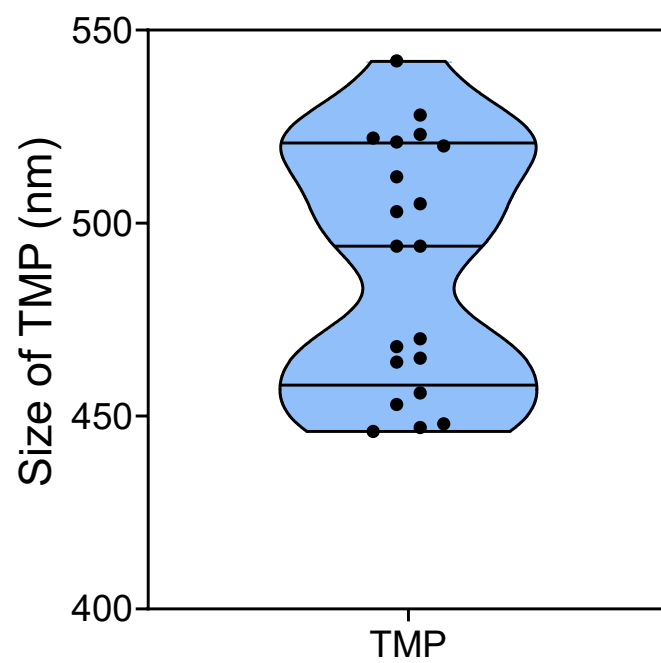

**Figure S1.** The diameter of TMP measured from SEM images ( $n = 20$ ).
